# Supplementary material
Source: MDPI journal article supplement (https://www.mdpi.com/2504-3900/97/1/5)
Supplement: s1 [file s1]

# Amperometric Biosensing of L-Glutamate Using Reduced Graphene Oxide and Glutamate Oxidase <sup>†</sup>

Ieva Sakinyte-Urbikiene <sup>\*</sup>, Vidute Gureviciene and Julija Razumiene

Life Sciences Center, Institute of Biochemistry, Vilnius University, Sauletekio Av. 7,  
LT-10257 Vilnius, Lithuania; vidute.gureviciene@gmc.vu.lt (V.G.); julija.razumiene@gmc.vu.lt (J.R.)

<sup>\*</sup> Correspondence: ieva.sakinyte@gmc.vu.lt; Tel.: +37060179928

<sup>†</sup> Presented at the XXXV EUROSENSORS Conference, Lecce, Italy, 10–13 September 2023.

## 1. Introduction

The RGO-based biosensor has been tested for L-glutamate detection in wild-type rat brain samples. For this purpose, 50  $\mu\text{L}$  of the diluted brain in 1.5 ml sodium phosphate buffer solution was added to 1 mL of the electrochemical cell and the electrochemical signals were recorded. The concentration of L-glutamate was calculated using the calibration curve. It was found that different brain samples contain from  $10.4 \pm 0.3$  to  $26.8 \pm 2.3$   $\mu\text{mol/g}_{\text{brain}}$  of L-glutamate.

**Table S1.** Concentrations of L-glutamate in brain samples obtained using RGO-based biosensor.

| No. | C (L-glutamate), $\mu\text{mol/g}_{\text{brain}}$ ( $n=3$ ) | SE        |
|-----|-------------------------------------------------------------|-----------|
| 1   | 15.9                                                        | $\pm 1.2$ |
| 2   | 10.4                                                        | $\pm 0.3$ |
| 3   | 17.9                                                        | $\pm 0.6$ |
| 4   | 17.0                                                        | $\pm 0.8$ |
| 5   | 12.7                                                        | $\pm 1.1$ |
| 6   | 26.8                                                        | $\pm 2.3$ |

**Table S2.** Comparison of analytical performance of Pt- and RGO-based biosensors.

| Electrode material | Operating voltage, V | Linear detection range, mM | Sensitivity, $\mu\text{A} \cdot \text{mM}^{-1} \cdot \text{cm}^{-2}$ | $K_{\text{M}}^{\text{app}}$ , mM |
|--------------------|----------------------|----------------------------|----------------------------------------------------------------------|----------------------------------|
| Pt                 | +0.6                 | 0.0005 – 0.15              | 3.6                                                                  | $0.34 \pm 0.02$                  |
| RGO                | -0.1                 | 0.05 – 0.5                 | 5.4                                                                  | $1.68 \pm 0.4$                   |

The sensitivity of the Pt biosensor operating at +0.6 V was found to be  $3.6 \mu\text{A mM}^{-1} \text{cm}^{-2}$ , apparent Michaelis constant  $K_{\text{M}}^{\text{app}} = 0.34 \pm 0.02$  mM, while RGO-based biosensor operating at -0.1 V demonstrated sensitivity of  $1.5 \pm 5.4 \mu\text{A mM}^{-1} \text{cm}^{-2}$  and  $K_{\text{M}}^{\text{app}} = 1.68 \pm 0.4$  mM. The linearity of calibration curves ranged from 0.05 to 0.5 mM and from 0.0005 to 0.15 mM of RGO- and Pt-based biosensors, respectively.
